# Supplementary material for: Distinct surface response to black carbon aerosols
Source: Copernicus journal article supplement (doi:10.5194/acp-2021-186), 2021-05-12
Supplement: Supplementary file 1 [file acp-2021-186-supplement.pdf]

## **Supporting Information for *Distinct surface response to black carbon aerosols***

Tang et al.

This supporting information contains Fig. S1-Fig. S6.

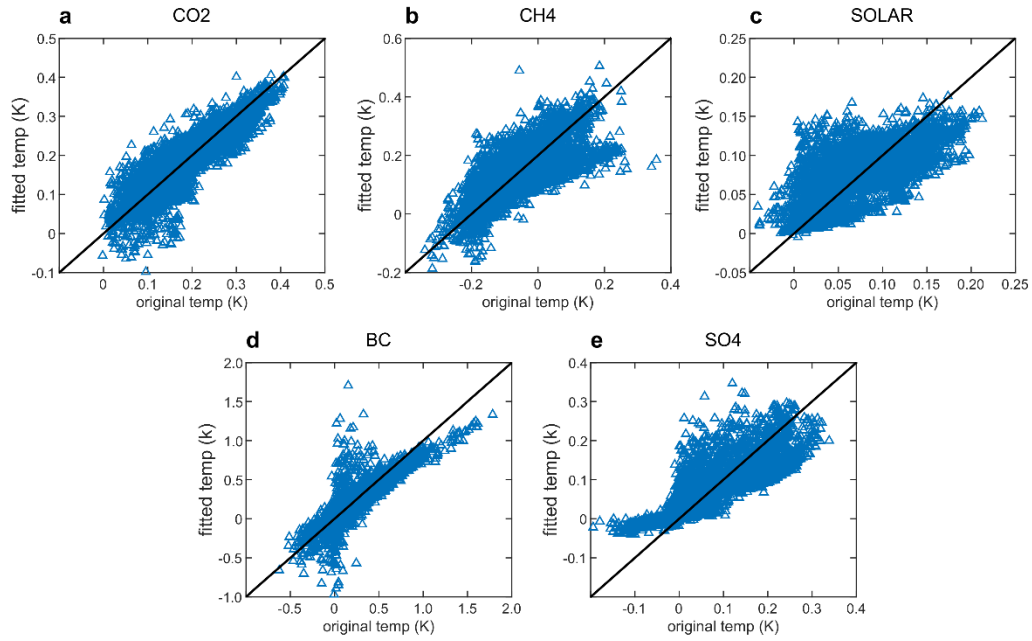

**Figure S1: Comparison of original  $\Delta T$  and fitted  $\Delta T$  from the linear regression models. The black thick lines in each plot are one-one lines.**

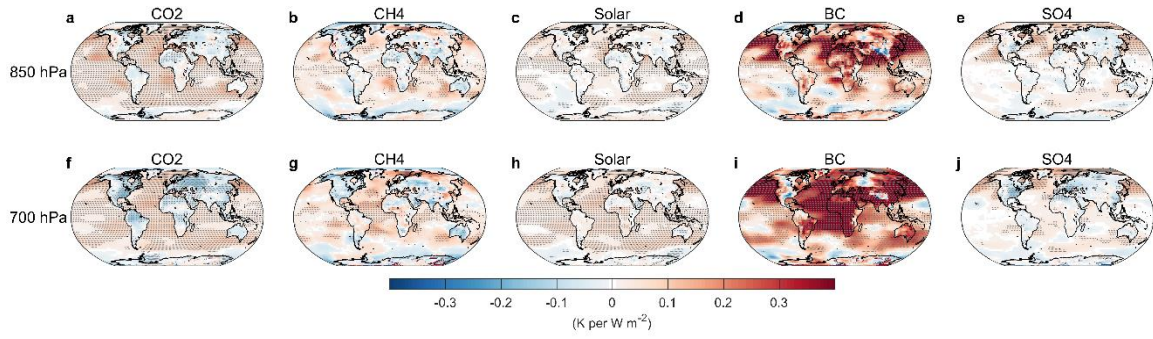

**Figure S2:** Same as Figure 3 in the main text, but for LTS of 850 hPa and 700 hPa. Positive anomalies indicate more stable atmosphere.

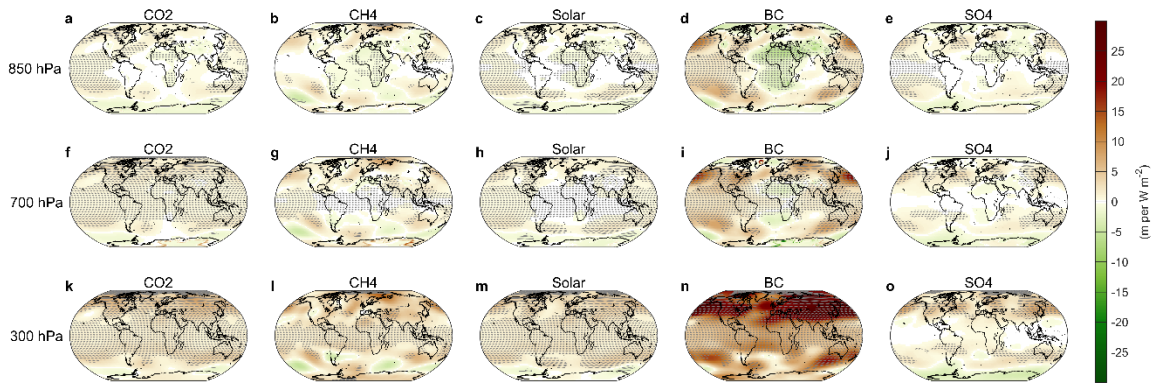

**Figure S3:** Same as Figure 3 in the main text, but for geopotential height changes at 850 hPa, 700 hPa and 300 hPa.

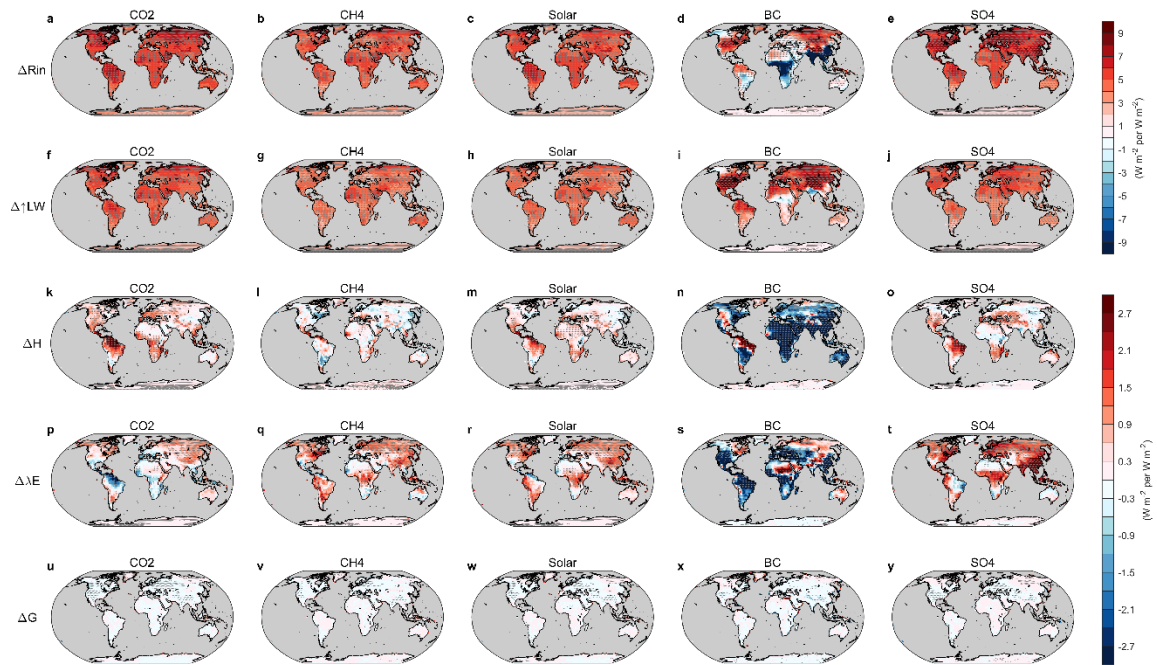

Figure S4: Same as Fig. 3 in the main text, but for the coupled simulations (near-equilibrium state).

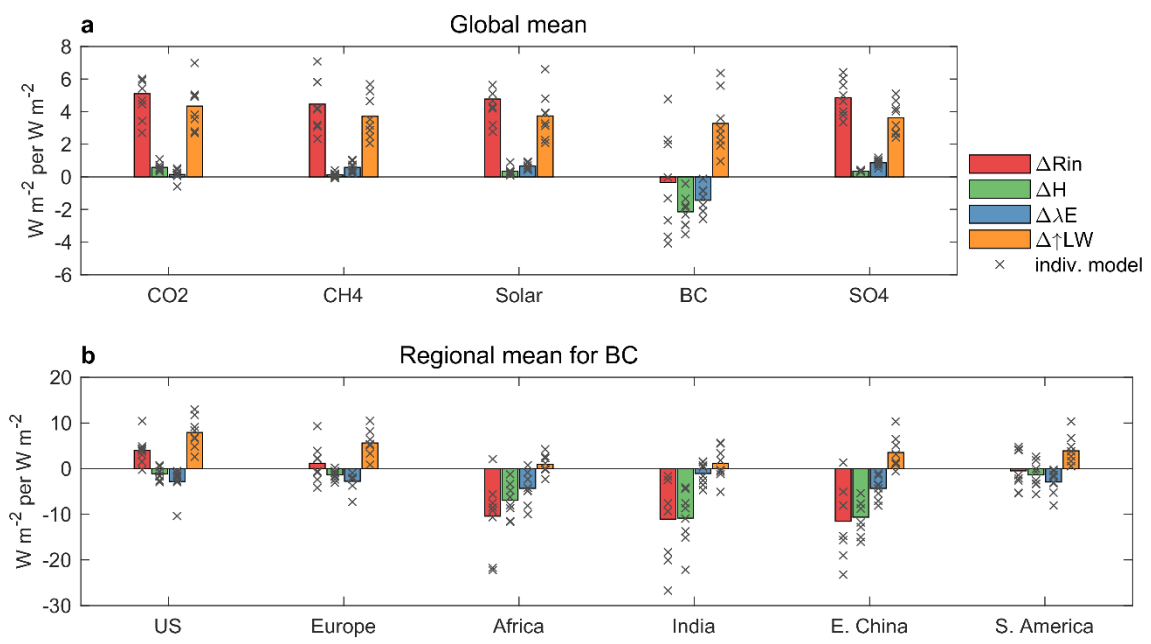

**Figure S5: Same as Fig. 4 in the main text, but for the coupled simulations (near-equilibrium state).**

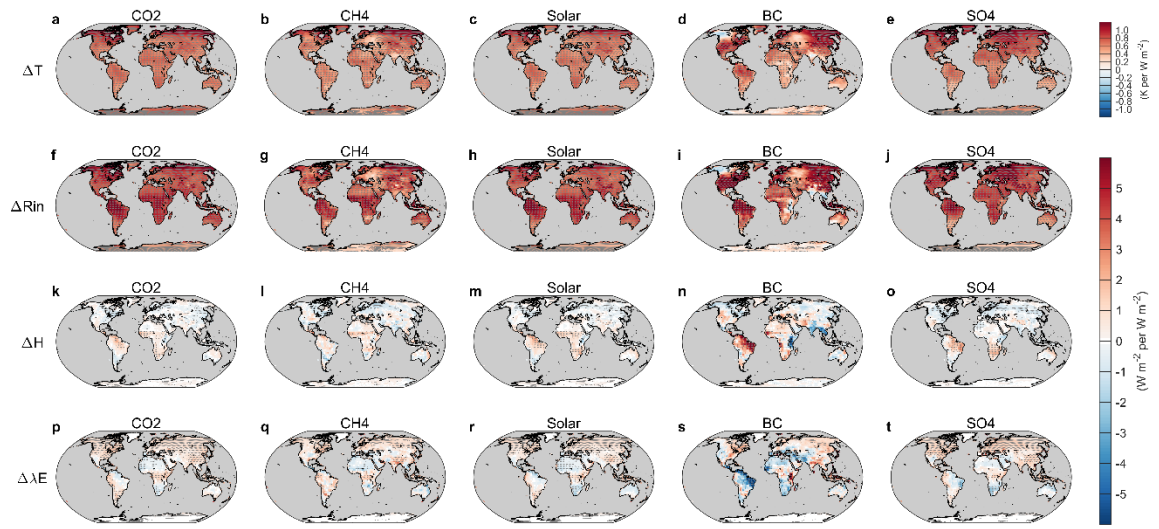

**Figure S6:** Same as Fig. 3 in the main text, but for the slow response, which is obtained by subtracting fast simulations from coupled simulations.
